# Supplementary material
Source: publisher site journal article supplement (https://www.dovepress.com/get_supplementary_file.php?f=375049.docx)
Supplement: Supplementary file 1 [file get_supplementary_file.php]

# Supplementary materials

**Supplementary Table 1.** Participant entry questionnaire

| **Question** | **Answers** |
| --- | --- |
| **1. Smartphone usage status** | |
| 1.1. Do you usually carry a smartphone? | Always Almost always Sometimes Few None |
| 1.2. What kind of function do you usually use? (multiple selections are possible) | Email SNS and chat (LINE, Facebook etc.) Internet search (Safari, Google, etc.) Applications None |
| 1.3. Do you use apps related with healthcare? | Pedometer app (Apple, etc. of Apple Healthcare) Weight management app Body temperature management app Diet management application Sleep management app None |
| 1.4. Do you use digital healthcare device linked to your smartphone? | Watch-type wearable devices (e.g. Apple watch, Fitbit, Garmin) Weight scale, body composition meter (e.g. Fitbit Aria) Diabetes monitoring device Manometer for blood pressure None |
| **2. About your disease except for COPD** | |
| 2.1. Please select your disease except for COPD | Bronchial asthma Allergic rhinitis Atopic dermatitis Allergic conjunctivitis Food allergy Other or unknown None |
| **3. Background and expectations for telemonitoring (Please answer recalling your status before using YaDoc)** | |
| 3.1. What do you expect for telemonitoring? (select all applicable answers, multiple answers are possible) | Receive appropriate treatment from my doctor according to my symptoms Help me understand my disease and the way it changes Help me communicate with my chest problems None |
| 4.1. Are you worried about telemonitoring during this trial? (if so, select applicable answers, multiple answers are possible) | Not understanding the settings or operation in the app Need for continuous input Incorrect input information Concern for personal information leaks Need long time to operate Other not described None |

COPD, chronic obstructive pulmonary disease.

**Supplementary Table 2.** YaDoc daily questions

| **Daily questions** |
| --- |
| Do you have more dyspnea than usual today? (Yes/No) |
| Do you have more cough than usual today? (Yes/No) |
| Do you have more sputum than usual today? (Yes/No) |
| Do you feel more fatigued than usual today? (Yes/No) |
| Did you sleep well last night? (Yes/No) |
| How many occasions did you take your rescue medication (salbutamol) inhaler in the last 24 hours? (0, 1–2, 3–4, 5–6, 7+) |
| How much did your health impact your ability to complete your usual activity today? (0–5 scale: 0 = my health did not impact my usual activity today, 5 = I could not complete my usual activity today) |

**Supplementary Table 3.** List of approving institutional review boards and/or independent ethics committee(s) at all investigational sites

| **Study site** | **Ethics Committee** |
| --- | --- |
| Matsusaka Municipal Hospital | Matsusaka Municipal Hospital Clinical Research Ethics Review Board |
| Iizuka Hospital | Iizuka Hospital Clinical Research Management Committee |
| Tohoku Rousai Hospital | Tohoku Rousai Hospital Ethics Committee |
| Nagata Hospital | Nagata Hospital Institutional Review Board |
| Tokyo Shinagawa Hospital | Tokyo Shinagawa Hospital Clinical Research Ethics Review Board |
| JCHO Tokyo Shinjuku Medical Center | JCHO Tokyo Shinjuku Medical Center Ethics Committee |

**Supplementary Table 4.** Compliance with YaDoc across the study

| **Data entry** | **Study phase** | | |
| --- | --- | --- | --- |
| **0 to 3 months**  **Total**  **(N=84)** | **3 to 6 months**  **Total**  **(N=84)** | **6 to 12 months**  **Total**  **(N=84)** |
| **Daily questionnaire entry (%)a** |  |  |  |
| Mean (SD) | 65.6 (33.65) | 62.7 (36.11) | 53.7 (36.86) |
| Median (IQR) | 84.8 (34.78–93.48 | 82.4 (30.77–95.60) | 64.7 (14.84–88.46) |
| **Weekly CAT entrya** |  |  |  |
| Mean (SD) | 75.7 (31.48) | 68.4 (39.47) | 62.9 (37.48) |
| Median (IQR) | 92.3 (31.38–100.00) | 91.7 (25.00–100.00) | 76.0 (32.00–96.00) |

a0 to 3 months, n=83; 3 to 6 months, n=83; 6 to 12 months, n=82.

CAT, COPD Assessment Test; COPD, chronic obstructive pulmonary disease; IQR, interquartile range; SD, standard deviation.

**Supplementary Table 5.** Compliance with YaDoc by subgroups

| **Subgroup** | **Daily questionnaire entry (%)**  **(N=84)** | **Weekly CAT entry (%)**  **(N=84)** |
| --- | --- | --- |
| **Sex, mean (SD)** | | |
| Female (n=10) | 58.0 (35.06) | 54.3 (33.74) |
| Male (n=73) | 59.4 (33.58) | 69.2 (32.51) |
| **Age, year, mean (SD)** | | |
| <69.5 (n=41) | 63.5 (32.72) | 71.7 (29.83) |
| ≥69.5 (n=42) | 55.1 (34.21) | 63.2 (35.35) |
| **GOLD grade, mean (SD)** | | |
| 1 (n=33) | 60.7 (36.72) | 65.3 (34.49) |
| 2 (n=37) | 58.7 (31.57) | 69.3 (32.18) |
| ≥3 (n=12) | 61.9 (29.57) | 72.9 (27.00) |
| **GOLD group, mean (SD)** | | |
| A (n=50) | 62.2 (35.09) | 67.5 (33.62) |
| B (n=26) | 55.7 (32.58) | 69.1 (34.11) |
| C (n=3) | 59.3 (24.36) | 56.0 (34.24) |
| D (n=4) | 45.8 (30.36) | 63.7 (17.73) |
| **Exacerbation history, mean (SD)** | | |
| Yes (n=12) | 57.3 (31.50) | 67.8 (26.04) |
| No (n=71) | 59.6 (34.08) | 67.3 (33.98) |
| **Allergic medical history, mean (SD)** | | |
| Yes (n=20) | 60.5 (36.2) | 58.1 (35.0) |
| No (n=64) | 58.9 (32.9) | 70.3 (31.8) |

CAT, COPD Assessment Test; COPD, chronic obstructive pulmonary disease; GOLD, Global initiative for chronic Obstructive Lung Disease; SD, standard deviation.

**Supplementary Table 6.** Participant acceptability of the YaDoc platform according to their exit questionnaires

| **Question** | **Response**  **N=84** |
| --- | --- |
| **1. Status of telemonitoring utilization** | |
| **1.1. How often did you perform telemonitoring? (including application use or browsing only) on average?, n (%)a** |  |
| 4 to 7 or more times a week | 53 (66.3) |
| About 1 to 3 times a week | 7 (8.8) |
| About 1 to 3 times a month | 9 (11.3) |
| Once every 2 to 3 months | 3 (3.8) |
| Less than 2 to 3 months | 8 (10.0) |
| **1.2.1. Communication with physicians by smartphones and/or phones, n (%)a** |  |
| 4 to 7 or more times a week | 2 (2.5) |
| About 1 to 3 times a week | 1 (1.3) |
| About 1 to 3 times a month | 2 (2.5) |
| Once every 2 to 3 months | 6 (7.5) |
| Less than 2 to 3 months | 69 (86.3) |
| **1.2.2. How often did you use the app data during consultation(s) with physicians regarding your symptoms?, n (%)a** |  |
| On all consultations | 6 (7.5) |
| Almost all consultations | 5 (6.3) |
| About half of consultations | 1 (1.3) |
| Some consultations | 7 (8.8) |
| Few consultations | 29 (36.3) |
| None | 32 (40.0) |
| **1.3. Did you use digital healthcare devices linked to your smartphone?, n (%)b,c** |  |
| Watch-type wearable devices (e.g. Apple watch, Fitbit, Garmin) | 7 (46.7) |
| Weight scale, body composition meter (e.g. Fitbit Aria) | 8 (53.3) |
| Diabetes monitoring device | 1 (6.7) |
| Manometer for blood pressure | 5 (33.3) |
| None | 0 (0) |
| **2. Effects of telemonitoring** | |
| **2.3. What are the benefits of performing online monitoring?, n (%)a,c** |  |
| Easier capture for my symptom worsening or improvement | 28 (35.0) |
| Appropriate treatment according to symptoms | 7 (8.8) |
| Easier consultation with physicians at interview and/or symptom change | 21 (26.3) |
| Enables selfcare even at home as planned | 7 (8.8) |
| Deepen my understanding for the disease | 24 (30.0) |
| At the time of medical interview, I could reduce the time spent on explaining my symptoms by sharing the data from the platform | 7 (8.8) |
| Other not specified | 6 (7.5) |
| None | 25 (31.3) |
| **3．Future task for telemonitoring** | |
| **3.1. Did you experience any issues with this telemonitoring system in this study?, n (%)a,c** |  |
| Not understanding the settings or operation in the app | 11 (13.8) |
| Need for continuous input | 18 (22.5) |
| Incorrect input information | 5 (6.3) |
| Concern for personal information leaks | 2 (2.5) |
| Need long time to operate | 2 (2.5) |
| Other not described | 13 (16.3) |
| None | 38 (47.5) |
| **4. Expectations and prospects for the future of telemonitoring** | |
| **4.1 What functions should the online telemonitoring system have for patients in order to optimize telemonitoring?, n (%)a,c** |  |
| Reminder for interview and/or alert notification | 17 (21.3) |
| Reward (for points, etc.) for input | 2 (2.5) |
| Message function in the case of symptoms change (eg, prompting a call to a medical institution, etc.) | 43 (53.8) |
| Providing content to deepen disease understanding | 28 (35.0) |
| Providing content that enhances understanding of treatment methods such as respiratory care inhaler technique and prescription drug information | 23 (28.8) |
| Introduction of additional wearable devices (such as medication use status and lung function testing) | 12 (15.0) |
| Other | 4 (5.0) |
| None | 13 (16.3) |
| **5. Future intention to continue (exit questionnaire only)** | |
| **5.1. Do you want to continue to use telemonitoring in the future?, n (%)a** |  |
| Strongly agree | 3 (3.8) |
| Agree | 38 (47.5) |
| Neither agree nor disagree | 29 (36.3) |
| Disagree | 8 (10.0) |
| Strongly disagree | 2 (2.5) |

an=80; bn=15; cMultiple selections are possible.

**Supplementary Table 7.** Physician and facility staff acceptability of the YaDoc platform according to their exit questionnaires

| **Question** | **Response**  **N=26** |
| --- | --- |
| **1. Implementation status of telemonitoring** | |
| **1.1. How often did you look at patients’ telemonitoring data (including application use or browsing only) on average in the past few months?, n (%)a** |  |
| 4 to 7 or more times a week | 5 (20.8) |
| About 1 to 3 times a week | 3 (12.5) |
| About 1 to 3 times a month | 7 (29.2) |
| Once every 2 to 3 months | 7 (29.2) |
| None | 2 (8.3) |
| **1.2. How long did you spend on average looking at each patient data on each occasion?, n (%)a** |  |
| 30 minutes or more | 0 (0) |
| 10 to 30 min | 3 (12.5) |
| About 10 min | 3 (12.5) |
| About 5 min | 8 (33.3) |
| Less than 5 min | 10 (41.7) |
| **1.3. Utility of the telemonitoring platform** | |
| **1.3.1. For how many patients did you refer to YaDoc as a communication tool with at the time of on-site medical care?, n (%)a** |  |
| All patients | 3 (12.5) |
| Almost all patients | 4 (16.7) |
| About half patients | 5 (20.8) |
| Some patients | 7 (29.2) |
| Few or no patients | 5 (20.8) |
| **1.3.2. For how many patients did you use YaDoc for the purpose of active interventions? (e.g. change for maintenance therapy), n (%)a** |  |
| All patients | 1 (4.2) |
| Almost all patients | 2 (8.3) |
| About half patients | 2 (.8.3) |
| Some patients | 9 (37.5) |
| Few or no patients | 8 (33.3) |
| Not applicable | 2 (8.3) |
| **2. Effects of telemonitoring** | |
| **2.3. What is the impact of the data on treatment of telemedicine participants in your medical service?, n (%)a,b** |  |
| Ease of capture of patient's symptom worsening or improvement beyond a standard clinical consultation | 12 (50.0) |
| Facilitates judgement for clinical examination and/or medication change | 2 (8.3) |
| Close and more smooth communication with patients at interview | 10 (41.7) |
| Patients can be treated at home as planned | 2 (8.3) |
| I was able to raise patient awareness and deepen my understanding of their disease | 9 (37.5) |
| At the time of medical interview, I could reduce the time spent on patient interviews | 5 (20.8) |
| None | 4 (16.7) |
| **3．Future task for telemonitoring** | |
| **3.1. What were the problems with telemonitoring in this study?, n (%)a,b** |  |
| Operational burden requiring time for explanation to patients | 11 (45.8) |
| Inquiry from patient, correspondence outside medical hours | 5 (20.8) |
| Enrollment difficulties with the online system | 13 (54.2) |
| Data entry error by patients data accuracy) | 1 (4.2) |
| Other | 2 (8.3) |
| None | 6 (25.0) |
| **4. Expectations and prospects for the future of telemonitoring** | |
| **4.1 What functions should be available on an online telemonitoring system for healthcare providers in order to optimize the utility of telemonitoring?, n (%)a,b** |  |
| Capture / alert patients with large changes in symptoms or health status (e.g. display of patients with increased CAT and/or mMRC score in patient listing) to contact HCP | 17 (70.8) |
| Display changes in health status, symptoms, rescue medication use or vital signs | 11 (45.8) |
| Providing reference information (e.g. display of treatment guidelines such as recommendation in the case of CAT score worsening) | 6 (25.0) |
| Providing prescription drug information (e.g. refer to the package insert such as side effects of drugs) | 4 (16.7) |
| Inquiry capability (e.g. inquiry to specialists/ reference of past inquiry history) | 3 (12.5) |
| Other not specified | 1 (4.2) |
| None | 3 (12.5) |
| **4.2. What functions should the online telemonitoring system have for patients in order to optimize telemonitoring capability?, n (%)a,b** |  |
| Alert notification to remind patient to input data for monitoring | 8 (33.3) |
| Incentive to input for monitoring (e.g. points) | 14 (58.3) |
| Sending messages if large changes in symptom (e.g. recommendation for a call to hospital/clinic, etc.) | 13 (54.2) |
| Providing content to deepen disease understanding | 11 (45.8) |
| Providing content that enhances understanding of treatment (e.g. respiratory care, inhaler technique, and method for administration of drug) | 10 (41.7) |
| Introduction of additional wearable devices (e.g. monitoring for treatment compliance, lung function tests) | 5 (20.8) |
| None | 1 (4.2) |

an=24; bMultiple selections are possible.

CAT, COPD Assessment Test; COPD, chronic obstructive pulmonary disease; HCP, healthcare professional; mMRC, modified Medical Research Council.
